# Supplementary material for: A Bayesian Approach to Evaluation of Soil BiogeochemicalModels
Source: Copernicus journal article supplement (doi:10.5194/bg-2020-23), 2020-02-19
Supplement: Supplementary file 1 [file bg-2020-23-supplement.pdf]

## Supplemental Materials

2 **Supplemental Table 1:** List of CON and AWB model parameters.

| Model   | Parameter  | Value, if not varied | Units                                     | Parameter Description                        |
|---------|------------|----------------------|-------------------------------------------|----------------------------------------------|
| CON/AWB | $I_S$      | 0.0009               | mg C g <sup>-1</sup> soil h <sup>-1</sup> | External SOC input rate                      |
| CON/AWB | $I_D$      | 0.0001               | mg C g <sup>-1</sup> soil h <sup>-1</sup> | External DOC input rate                      |
| CON     | $k_{Sref}$ | Dependent            | mg C mg <sup>-1</sup> C h <sup>-1</sup>   | SOC decay constant                           |
| CON     | $k_{Dref}$ | Dependent            | mg C mg <sup>-1</sup> C h <sup>-1</sup>   | DOC decay constant                           |
| CON     | $k_{Mref}$ | Dependent            | mg C mg <sup>-1</sup> C h <sup>-1</sup>   | MIC decay constant                           |
| CON     | $u_M$      | 0.002                | mg C g <sup>-1</sup> DOC h <sup>-1</sup>  | DOC uptake rate of microbes                  |
| CON     | $Ea_S$     | Fitted by HMC        | kJ mol <sup>-1</sup>                      | SOC activation energy                        |
| CON     | $Ea_D$     | Fitted by HMC        | kJ mol <sup>-1</sup>                      | DOC activation energy                        |
| CON     | $Ea_M$     | Fitted by HMC        | kJ mol <sup>-1</sup>                      | MIC activation energy                        |
| CON     | $a_{DS}$   | Fitted by HMC        |                                           | DOC to SOC transfer coefficient              |
| CON     | $a_{SD}$   | Fitted by HMC        |                                           | SOC to DOC transfer coefficient              |
| CON     | $a_M$      | Fitted by HMC        |                                           | MIC to SOC transfer coefficient              |
| CON     | $a_{MS}$   | Fitted by HMC        |                                           | Fraction of dead MIC transferred             |
| AWB     | $K_{ref}$  | Dependent            | mg C g <sup>-1</sup> soil                 | SOC reference $K_M$                          |
| AWB     | $K_{Uref}$ | Dependent            | mg C g <sup>-1</sup> soil                 | DOC uptake into MIC reference $K_M$          |
| AWB     | $V_{ref}$  | Fitted by HMC        | mg C mg <sup>-1</sup> C h <sup>-1</sup>   | SOC reference $V_{max}$                      |
| AWB     | $V_{Uref}$ | Fitted by HMC        | mg C mg <sup>-1</sup> MIC h <sup>-1</sup> | DOC uptake into MIC reference $V_{max}$      |
| AWB     | $Ea_K$     | Fitted by HMC        | kJ mol <sup>-1</sup>                      | SOC $K_M$ activation energy                  |
| AWB     | $Ea_{KU}$  | Fitted by HMC        | kJ mol <sup>-1</sup>                      | DOC uptake $K_M$ activation energy           |
| AWB     | $Ea_V$     | Fitted by HMC        | kJ mol <sup>-1</sup>                      | SOC $V_{max}$ activation energy              |
| AWB     | $Ea_{VU}$  | Fitted by HMC        | kJ mol <sup>-1</sup>                      | DOC uptake $V_{max}$ activation energy       |
| AWB     | $r_E$      | Dependent            | mg C mg <sup>-1</sup> MIC h <sup>-1</sup> | Enzyme production rate                       |
| AWB     | $r_L$      | 0.0005               | mg C mg <sup>-1</sup> C h <sup>-1</sup>   | Enzyme loss rate                             |
| AWB     | $r_M$      | Dependent            | mg C mg <sup>-1</sup> C h <sup>-1</sup>   | MIC death rate                               |
| AWB     | $E_{Cref}$ | Fitted by HMC        | mg C mg <sup>-1</sup> C                   | Reference temperature C use efficiency (CUE) |
| AWB     | $m_t$      | Fitted by HMC        | °C <sup>-1</sup>                          | CUE temperature change slope                 |

4

6

8

10

12

14

16

18 **Supplemental Appendix 1**

20 **(a) CON ODE system equations**

20 The conventional (CON) model consists of three C pools in SOC, DOC, and MIC. The mass transfer of C between  
 22 these pools is represented as first-order linear decay processes. The CON model obeys the following dynamics:

$$\frac{dS}{dt} = I_S + a_{DS}k_D D + a_M a_{MS} k_M M - k_S S \quad (1)$$

$$\frac{dD}{dt} = I_D + a_{SD}k_S S + a_M(1 - a_{MS})k_M M - u_M D - k_D D \quad (2)$$

$$\frac{dM}{dt} = u_M D - k_M M \quad (3)$$

28 The decay constants  $k_I$  vary from their reference values  $k_{Iref}$  based on the Arrhenius equation of temperature  
 30 dependence,

$$k_I = k_{Iref} \exp \left[ -\frac{E a_I}{R} \left( \frac{1}{T} - \frac{1}{T_{ref}} \right) \right] \quad (4)$$

34 where  $R$  is the ideal gas constant 8.314 J mol<sup>-1</sup> K<sup>-1</sup> and the reference temperature  $T_{ref}$  used was 283.15 K.

36 CO<sub>2</sub> soil flux is calculated from the CON model by summing the proportion of fluxes that do not enter soil C pools  
 38 at each time step:

$$\text{CON flux} = k_S S(1 - a_{SD}) + k_D D(1 - a_{DS}) + k_M M(1 - a_M) \quad (5)$$

40 Response ratios are then calculated from the model output flux by dividing the flux calculated at a given time point  
 42 by the pre-warming steady state flux.

44 **(b) AWB ODE system equations**

46 The Allison-Wallenstein-Bradford (AWB) model consists of four C pools in SOC, DOC, MIC, and ENZ  
 48 (representing the extracellular enzyme C mass). In the AWB model, MIC accumulation and SOC decomposition  
 follow a non-linear Michaelis-Menten function. Other processes, including ENZ production, ENZ loss, and MIC  
 death still follow a first-order linear decay process. The AWB system equations are as follows:

$$\frac{dS}{dt} = I_S + a_{MS} r_M M - \frac{VES}{K + S} \quad (6)$$

$$\frac{dD}{dt} = I_D + (1 - a_{MS}) r_M M + \frac{VES}{K + S} + r_L E - \frac{V_U MD}{K_U + D} \quad (7)$$

$$\frac{dM}{dt} = E_C \frac{V_U MD}{K_U + D} - r_M M - r_E M \quad (8)$$

56 Similar to the CON decay constants, the Michaelis-Menten function parameters  $K$ ,  $K_U$ ,  $V$ , and  $V_U$  vary from their  
 58 reference values based on the Arrhenius equation.  $E_C$ , the AWB microbial C use efficiency parameter, depends  
 linearly on temperature, following Li et al., 2014, and operates under the simplifying assumption that higher  
 60 temperatures make C use slightly less efficient:

$$E_C = E_{Cref} - m_t(T - T_{ref}) \quad (9)$$

The loss rate parameters  $r_l$  were not made to be temperature dependent.

64

AWB CO<sub>2</sub> flux is calculated as the proportion of the C transfer out of the DOC pool that is not partitioned into the MIC pool:

66

$$\text{AWB flux} = (1 - E_c) \frac{V_U MD}{K_U + D} \quad (10)$$

68

70

72

74

76

78

80

82

84

86

88

90

92

94

96

98

100

102

104

106

108

110

112

114

116

118

120 **Supplemental Appendix 2**122 **(a) Re-arranged CON steady state equations**

The steady state solutions for the C pools in CON are as follows:

124

$$D_0 = \frac{a_{SD}I_S + I_D}{u_M + k_D + u_M a_M (a_{MS} - a_{MS} a_{SD} - 1) - a_{DS} k_D a_{SD}} \quad (11)$$

126

$$M_0 = \frac{u_M}{k_M} D \quad (12)$$

128

$$S_0 = \frac{I_S + D(a_{MS} k_D + u_M a_M a_{MS})}{k_S} \quad (13)$$

130

To set pre-warming steady state soil C densities to desired values, we re-arranged the steady state equations into the following forms to solve for the steady state values of parameters that depend on the soil C densities:

132

134

$$k_{Mref} = \frac{u_M D_0}{M_0} \quad (14)$$

136

$$k_{Dref} = \frac{-I_D - a_{SD}I_S + u_M D_0 - a_M D_0 u_M + a_M a_{MS} u_M D_0 - a_M a_{MS} a_{SD} u_M D_0}{(a_{DS} a_{SD} - 1) D_0} \quad (15)$$

138

$$k_{Sref} = \frac{I_S + D_0(a_{DS} k_{Dref} + u_M a_M a_{MS})}{S_0} \quad (16)$$

140 **(b) Re-arranged AWB steady state equations**

The steady state solutions for the C pools in AWB are as follows:

142

$$S_0 = \frac{-r_L K (I_S (r_M (1 + E_C (a_{MS} - 1)) + r_E (1 - E_C)) + E_C I_D a_{MS} r_M)}{I_S (r_M (r_L (1 + E_C (a_{MS} - 1))) + r_E (r_L (1 - E_C) - E_C V)) + E_C I_D (a_{MS} r_M r_L - r_E V)} \quad (17)$$

144

$$M_0 = \frac{E_C (I_D + I_S)}{(1 - E_C) (r_M + r_E)} \quad (18)$$

146

$$D_0 = \frac{-K_U (r_M + r_E)}{r_M + r_E - E_C V_U} \quad (19)$$

148

$$E_0 = \frac{r_E M}{r_L} \quad (20)$$

150

To set pre-warming steady state soil C densities to desired values, we re-arranged the steady state equations into the following forms:

152

$$r_M = \frac{-E_{Cref} (I_D + I_S) + M_0 r_E (1 - E_{Cref})}{M_0 (E_{Cref} - 1)} \quad (21)$$

154

$$K_{Uref} = \frac{-D_0 (r_M + r_E - E_{Cref} V_{Uref})}{r_M + r_E} \quad (22)$$

156

$$\begin{aligned}
& K_{ref} \\
158 \quad & = \frac{-S_0 \left( -I_S r_E r_L + E_{C_{ref}} I_S r_E r_L - a_{MS} E_{C_{ref}} I_D r_L r_M - I_S r_L r_M + E_{C_{ref}} I_S r_L r_M - a_{MS} E_{C_{ref}} I_S r_L r_M + E_{C_{ref}} I_D r_E V_{ref} + E_{C_{ref}} I_S r_E V_{ref} \right)}{r_L \left( -I_S r_E + E_{C_{ref}} I_S r_E - a_{MS} E_{C_{ref}} I_D r_M - I_S r_M + E_{C_{ref}} I_S r_M - a_{MS} E_{C_{ref}} I_S r_M \right)}
\end{aligned}$$

(23)

160  
162  
164  
166  
168  
170  
172  
174  
176  
178  
180  
182  
184  
186  
188  
190  
192  
194  
196  
198  
200  
202  
204  
206  
208

210 **Supplemental Figure 1:** Distribution of AWB fits to meta-analysis data (Romero-Olivares et al., 2017) with **(a)**  
211 MIC = 1 mg C g<sup>-1</sup> soil; and **(b)** MIC = 8 mg C g<sup>-1</sup> soil. Open circles show the meta-analysis data points. Blue  
212 vertical lines mark the 95% confidence interval for each data point calculated from the pooled standard deviation.  
213 The black line indicates the mean model fit. The orange shading marks the 95% posterior predictive interval for the  
214 fit. For **(a)** and **(b)**, the non-MIC pre-warming steady state soil C densities were set at SOC = 100 mg C g<sup>-1</sup> soil,  
DOC = 0.2 mg C g<sup>-1</sup> soil, and ENZ = 0.1 mg C g<sup>-1</sup> soil.

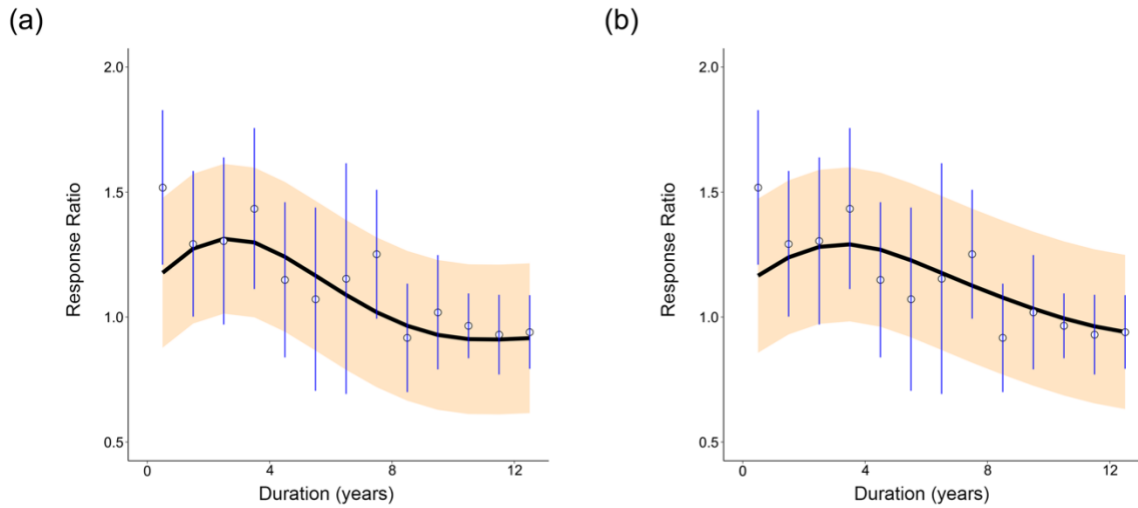

216  
218  
220  
222  
224  
226  
228  
230  
232  
234  
236  
238  
240  
242  
244

246 **Supplemental Figure 2:** 95% credible areas for (a) AWB  $V_{Uref}$ , and (b)  $m_i$  parameters corresponding to pre-warming steady state SOC = 100 mg C g<sup>-1</sup> soil, DOC = 0.2 mg C g<sup>-1</sup> soil, MIC = 2 mg C g<sup>-1</sup> soil, and ENZ = 0.1 mg C g<sup>-1</sup> soil.

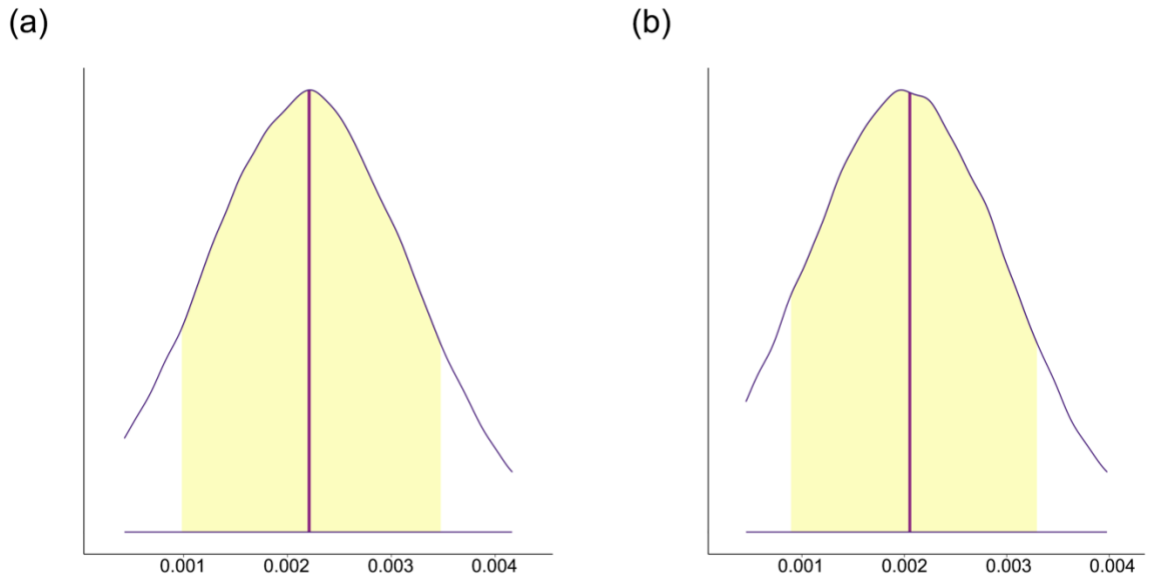

248  
250  
252  
254  
256  
258  
260  
262  
264  
266  
268  
270  
272  
274  
276  
278

280 **Supplemental Figure 3:** Fraction of SOC remaining 12 years after warming perturbation in AWB and CON  
simulations. **(a)** Pre-warming steady state SOC varied from 50 to 200 mg C g<sup>-1</sup> soil, with pre-warming MIC, DOC  
282 and ENZ held constant respectively at 2 mg C g<sup>-1</sup> soil, 0.2 mg C g<sup>-1</sup> soil, and 0.1 mg C g<sup>-1</sup> soil; **(b)**, Pre-warming  
MIC varied from 1 to 8 mg C g<sup>-1</sup> soil, with pre-warming SOC, DOC and ENZ held constant, respectively, at 100 mg  
C g<sup>-1</sup> soil, 0.2 mg C g<sup>-1</sup> soil, and 0.1 mg C g<sup>-1</sup> soil.

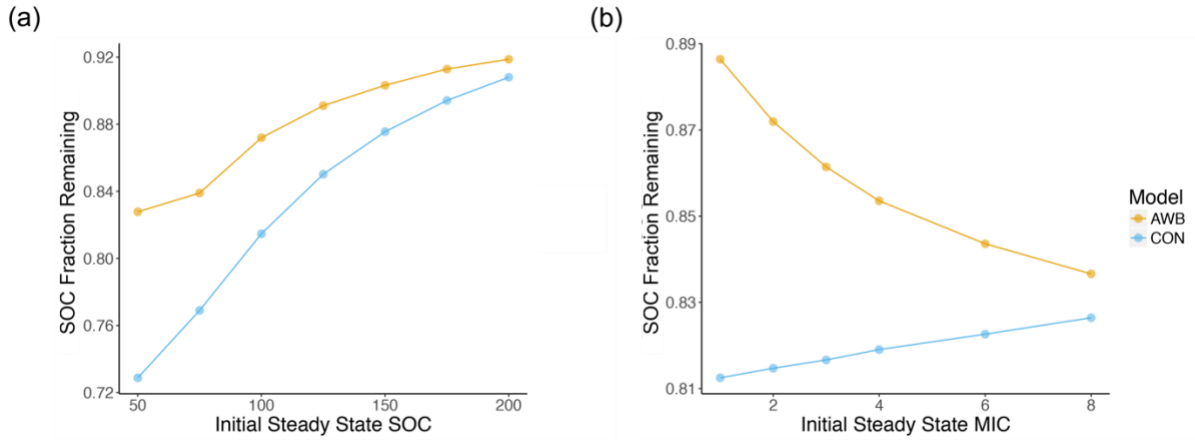

284  
286  
288  
290  
292  
294  
296  
298  
300  
302  
304  
306  
308  
310  
312  
314  
316  
318



320 **Supplemental Table 2:** AWB and CON prior distribution tables. Including  $\sigma$ , the residual error scale term, we fit 10  
 322 parameters in our AWB runs and 8 parameters in our CON runs. Normal, Gaussian priors were used for all fitted  
 324 ODE model parameters. The notation we use for our normal distributions follows an N(mean, standard deviation)  
 distribution per recommendations from literature (Gelman, 2006).

326 (a) CON priors

| Parameter | Distribution | Parameter Description            |
|-----------|--------------|----------------------------------|
| $Ea_S$    | N(50,25)     | SOC activation energy            |
| $Ea_D$    | N(50,25)     | DOC activation energy            |
| $Ea_M$    | N(50,25)     | MIC activation energy            |
| $a_{DS}$  | N(0.3,0.15)  | DOC to SOC transfer coefficient  |
| $a_{SD}$  | N(0.3,0.15)  | SOC to DOC transfer coefficient  |
| $a_M$     | N(0.3,0.15)  | MIC to SOC transfer coefficient  |
| $a_{MS}$  | N(0.5,0.25)  | Fraction of dead MIC transferred |
| $\sigma$  | Cauchy(0,1)  | Residual Error Scale             |

328 (b) AWB priors

| Parameter  | Distribution   | Parameter Description                   |
|------------|----------------|-----------------------------------------|
| $V_{ref}$  | N(0.4,0.2)     | SOC reference $V_{max}$                 |
| $V_{Uref}$ | N(0.01,0.005)  | DOC reference $V_{max}$                 |
| $Ea_V$     | N(50,25)       | SOC $V_{max}$ activation energy         |
| $Ea_{VU}$  | N(50,25)       | DOC $V_{max}$ activation energy         |
| $Ea_K$     | N(50,25)       | SOC $K_m$ activation energy             |
| $Ea_{KU}$  | N(50,25)       | DOC $K_m$ activation energy             |
| $E_{Cref}$ | N(0.4,0.2)     | Reference C use efficiency (CUE)        |
| $m_t$      | N(0.002,0.001) | CUE slope                               |
| $a_{MS}$   | N(0.5,0.25)    | Fraction of dead MBC transferred to SOC |
| $\sigma$   | Cauchy(0,1)    | Residual Error Scale                    |

330

332

334

336

338

340

342

344

346

348 **Supplemental Table 3:** Posterior means calculated for parameters that were fit in HMC runs are displayed in the following tables.

350 **(a) CON posterior distribution means for SOC-varied runs**

| Parameter | SOC = 50 | SOC = 75 | SOC = 100 | SOC = 125 | SOC = 150 | SOC = 175 | SOC = 200 |
|-----------|----------|----------|-----------|-----------|-----------|-----------|-----------|
| $Ea_S$    | 77.5688  | 73.5806  | 66.6395   | 60.8239   | 56.6663   | 53.5904   | 51.3607   |
| $Ea_D$    | 50.1994  | 50.327   | 50.2519   | 50.1629   | 50.1603   | 50.2286   | 50.1584   |
| $Ea_M$    | 52.4829  | 52.4331  | 52.2358   | 52.0848   | 51.9255   | 51.9786   | 51.7802   |
| $a_{DS}$  | 0.3246   | 0.3256   | 0.3271    | 0.3263    | 0.3262    | 0.3263    | 0.3271    |
| $a_{SD}$  | 0.3337   | 0.3351   | 0.3363    | 0.3363    | 0.337     | 0.3364    | 0.337     |
| $a_M$     | 0.3384   | 0.3397   | 0.337     | 0.3341    | 0.3333    | 0.3325    | 0.3314    |
| $a_{MS}$  | 0.5048   | 0.5032   | 0.5006    | 0.5001    | 0.4962    | 0.4971    | 0.496     |
| $\sigma$  | 0.1338   | 0.139    | 0.1552    | 0.1677    | 0.1765    | 0.183     | 0.1875    |

352 **(b) AWB posterior distribution means for SOC-varied runs**

| Parameter     | SOC = 50 | SOC = 75 | SOC = 100 | SOC = 125 | SOC = 150 | SOC = 175 | SOC = 200 |
|---------------|----------|----------|-----------|-----------|-----------|-----------|-----------|
| $V_{ref}$     | 0.3792   | 0.4043   | 0.4103    | 0.4154    | 0.4174    | 0.4211    | 0.4225    |
| $V_{U_{ref}}$ | 0.0104   | 0.0104   | 0.0104    | 0.0104    | 0.0104    | 0.0104    | 0.0104    |
| $Ea_V$        | 74.5409  | 70.1111  | 65.0713   | 62.2252   | 60.5653   | 59.1068   | 58.3651   |
| $Ea_{VU}$     | 50.2139  | 50.4011  | 50.6711   | 50.8293   | 50.9639   | 51.0867   | 51.0899   |
| $Ea_K$        | 26.0240  | 30.3601  | 35.4526   | 38.3727   | 40.2573   | 41.3633   | 42.1677   |
| $Ea_{KU}$     | 49.8581  | 49.5998  | 49.5098   | 49.2307   | 49.0796   | 48.9942   | 49.0002   |
| $E_{C_{ref}}$ | 0.2055   | 0.2523   | 0.3381    | 0.4041    | 0.4538    | 0.4905    | 0.5126    |
| $m_t$         | 0.0018   | 0.0021   | 0.0022    | 0.0022    | 0.0023    | 0.0023    | 0.0023    |
| $a_{MS}$      | 0.494    | 0.4984   | 0.5013    | 0.5064    | 0.5129    | 0.521     | 0.526     |
| $\sigma$      | 0.1521   | 0.1504   | 0.1601    | 0.1654    | 0.1698    | 0.1741    | 0.1781    |

354 **(c) CON posterior distribution means for MIC-varied runs**

| Parameter | MIC = 1 | MIC = 2 | MIC = 3 | MIC = 4 | MIC = 6 | MIC = 8 |
|-----------|---------|---------|---------|---------|---------|---------|
| $Ea_S$    | 67.3478 | 66.6395 | 66.0341 | 65.2664 | 64.1673 | 62.9712 |
| $Ea_D$    | 50.0552 | 50.2519 | 50.2694 | 50.5307 | 50.7564 | 50.8176 |
| $Ea_M$    | 50.8727 | 52.2358 | 53.0678 | 53.866  | 54.9957 | 55.6118 |
| $a_{DS}$  | 0.3271  | 0.3271  | 0.3259  | 0.3265  | 0.3267  | 0.3259  |
| $a_{SD}$  | 0.3328  | 0.3363  | 0.3402  | 0.3414  | 0.3455  | 0.3465  |
| $a_M$     | 0.3347  | 0.337   | 0.3371  | 0.3367  | 0.3363  | 0.3348  |
| $a_{MS}$  | 0.5044  | 0.5006  | 0.5     | 0.498   | 0.4957  | 0.494   |
| $\sigma$  | 0.155   | 0.1552  | 0.1549  | 0.1556  | 0.1556  | 0.1563  |

356 **(d) AWB posterior distribution means for MIC-varied runs**

| Parameter | MIC = 1 | MIC = 2 | MIC = 3 | MIC = 4 | MIC = 6 | MIC = 8 |
|-----------|---------|---------|---------|---------|---------|---------|
| $V_{ref}$ | 0.4026  | 0.4103  | 0.4149  | 0.4169  | 0.422   | 0.4241  |

|               |         |         |         |         |         |         |
|---------------|---------|---------|---------|---------|---------|---------|
| $V_{U_{ref}}$ | 0.0104  | 0.0104  | 0.0104  | 0.0104  | 0.0104  | 0.0104  |
| $Ea_V$        | 65.6762 | 65.0713 | 65.1575 | 65.314  | 65.6712 | 66.0533 |
| $Ea_{VU}$     | 50.7039 | 50.6711 | 50.6658 | 50.7089 | 50.5448 | 50.4471 |
| $Ea_K$        | 34.9008 | 35.4526 | 35.4906 | 35.3379 | 35.1293 | 34.871  |
| $Ea_{KU}$     | 49.4109 | 49.5098 | 49.5087 | 49.4814 | 49.4972 | 49.6048 |
| $E_{C_{ref}}$ | 0.2595  | 0.3381  | 0.395   | 0.4358  | 0.4959  | 0.5342  |
| $m_t$         | 0.0022  | 0.0022  | 0.0022  | 0.0022  | 0.0023  | 0.0023  |
| $a_{MS}$      | 0.4867  | 0.5013  | 0.5166  | 0.5348  | 0.5619  | 0.581   |
| $\sigma$      | 0.1596  | 0.1601  | 0.1604  | 0.1609  | 0.1629  | 0.1643  |

360  
362  
364  
366  
368  
370  
372  
374  
376  
378  
380  
382  
384  
386  
388  
390  
392  
394  
396  
398  
400

402

**Supplemental Figure 4:** Change in fit metrics for AWB and CON as pre-warming steady state MIC is varied from 1 to 8 mg C g<sup>-1</sup> soil. **(a)** LOO; **(b)** WAIC; **(c)** LPML; **(d)** R<sup>2</sup>

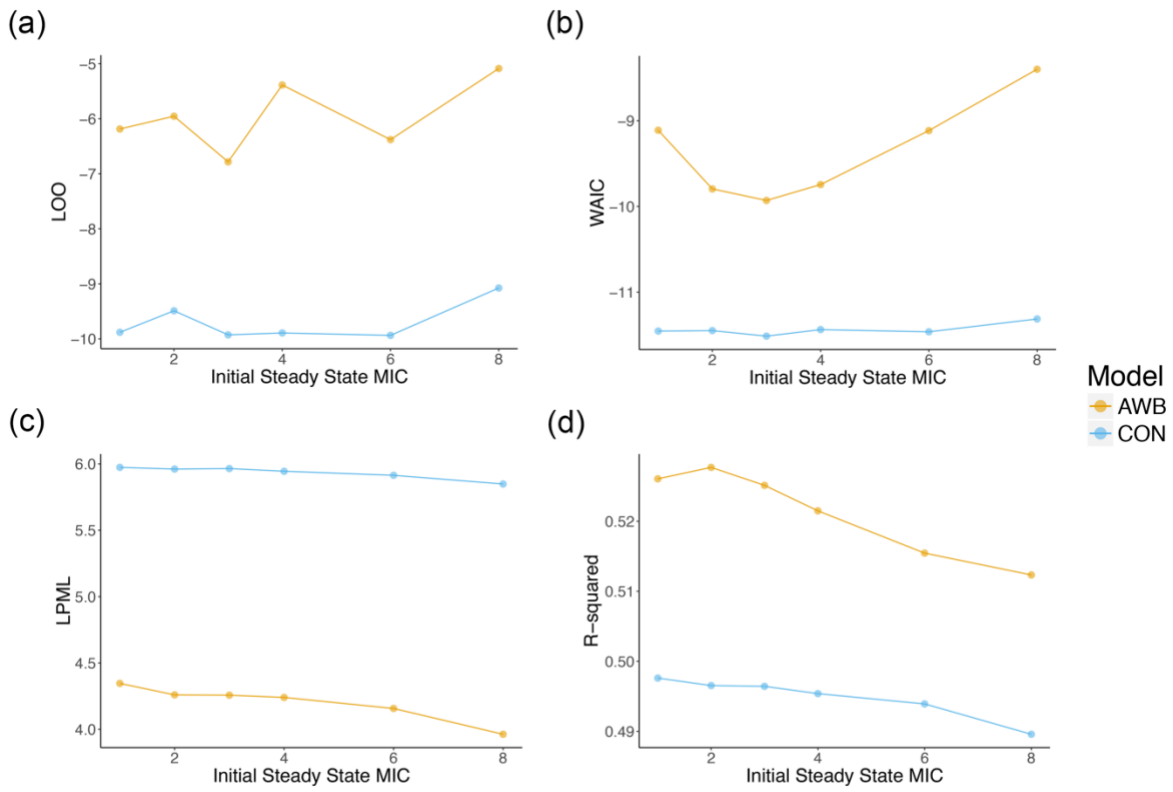

404

406

408

410

412

414

416

418

420

422

424

426

428

430 **Supplemental Figure 5:** Trace plots for AWB and CON parameters indicate that the Markov chains were well-  
 431 mixed with appropriate burn-in. Example trace plots depicted in which pre-warming SOC = 100 mg C g<sup>-1</sup> soil, MIC  
 432 = 2 mg C g<sup>-1</sup> soil, DOC = 0.2 mg C g<sup>-1</sup> soil, and (for AWB) ENZ = 0.1 mg C g<sup>-1</sup> soil. **(a)** CON E<sub>a</sub> parameters; **(b)**  
 CON partition fraction parameters; **(c)** AWB E<sub>a</sub> parameters; **(d)** AWB parameters V<sub>ref</sub>, EC<sub>ref</sub>, a<sub>MS</sub>, V<sub>Uref</sub>, and m<sub>i</sub>.

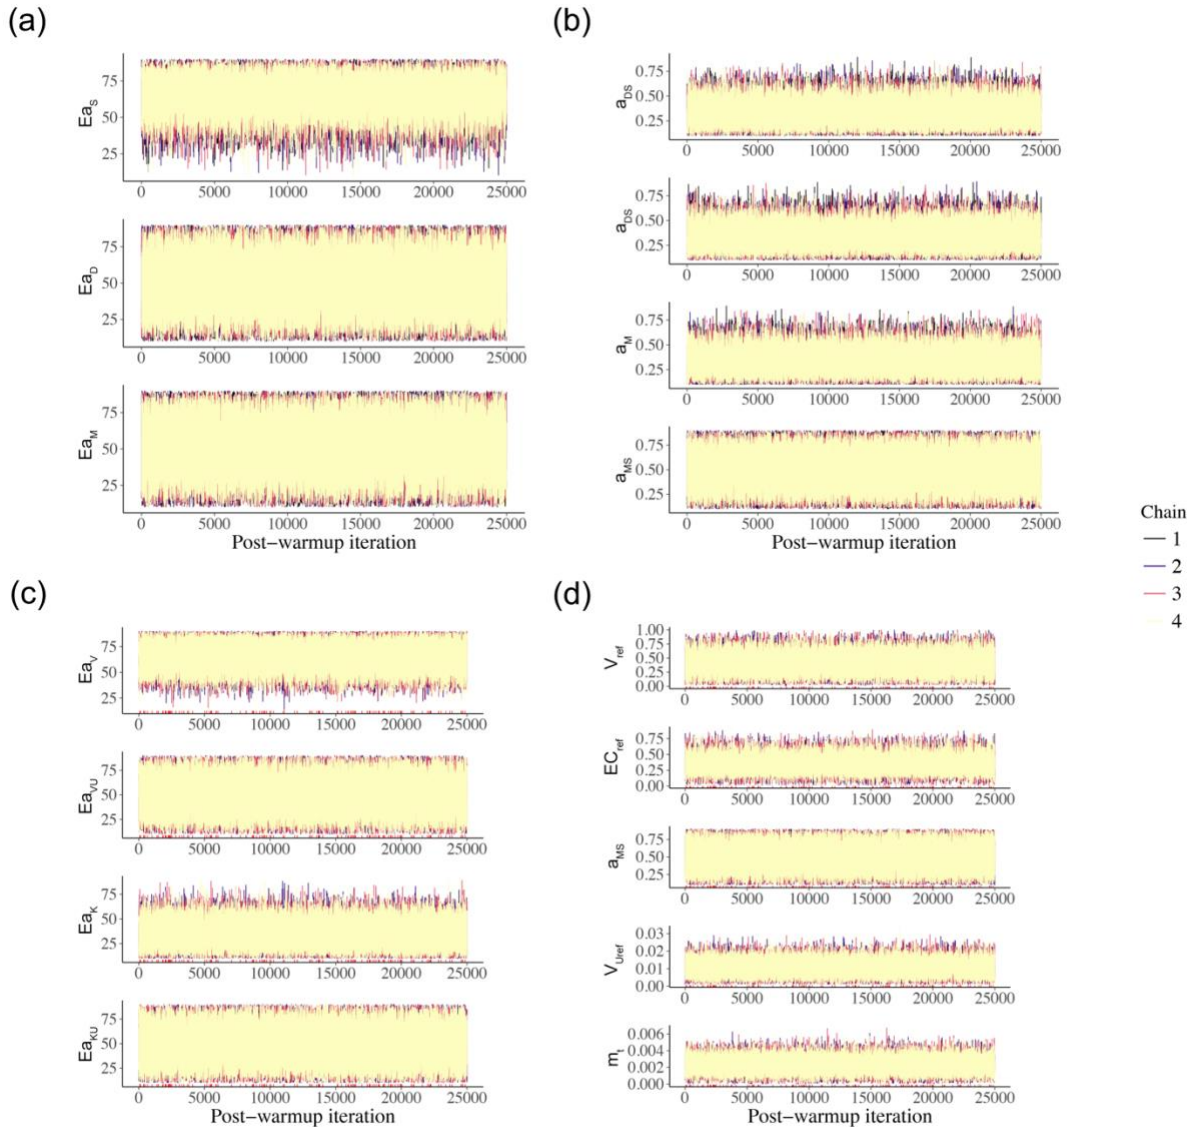

434

436

438

440

442

444

446 **Supplemental Figure 6:** Autocorrelation plots for pre-warming SOC = 100 mg C g<sup>-1</sup> soil, MIC = 2 mg C g<sup>-1</sup> soil,  
 448 DOC = 0.2 mg C g<sup>-1</sup> soil, and (for AWB) ENZ = 0.1 mg C g<sup>-1</sup> soil indicate effective sample collection. For all fitted  
 450 AWB and CON parameters, autocorrelation, or the dependence between values of the same parameter accepted by  
 452 Markov chains, tends to drop as lag, the distance between MCMC iterations increases. Low autocorrelation indicates  
 more independence between samples and more efficient collection of effective samples for inference. **(a)** CON  $E_a$   
 parameters; **(b)** CON partition fraction parameters; **(c)** AWB  $E_a$  parameters; **(d)** AWB parameters  $V_{ref}$ ,  $E_{Cref}$ ,  $a_{MS}$ ,  
 $V_{Uref}$ , and  $m_t$ .

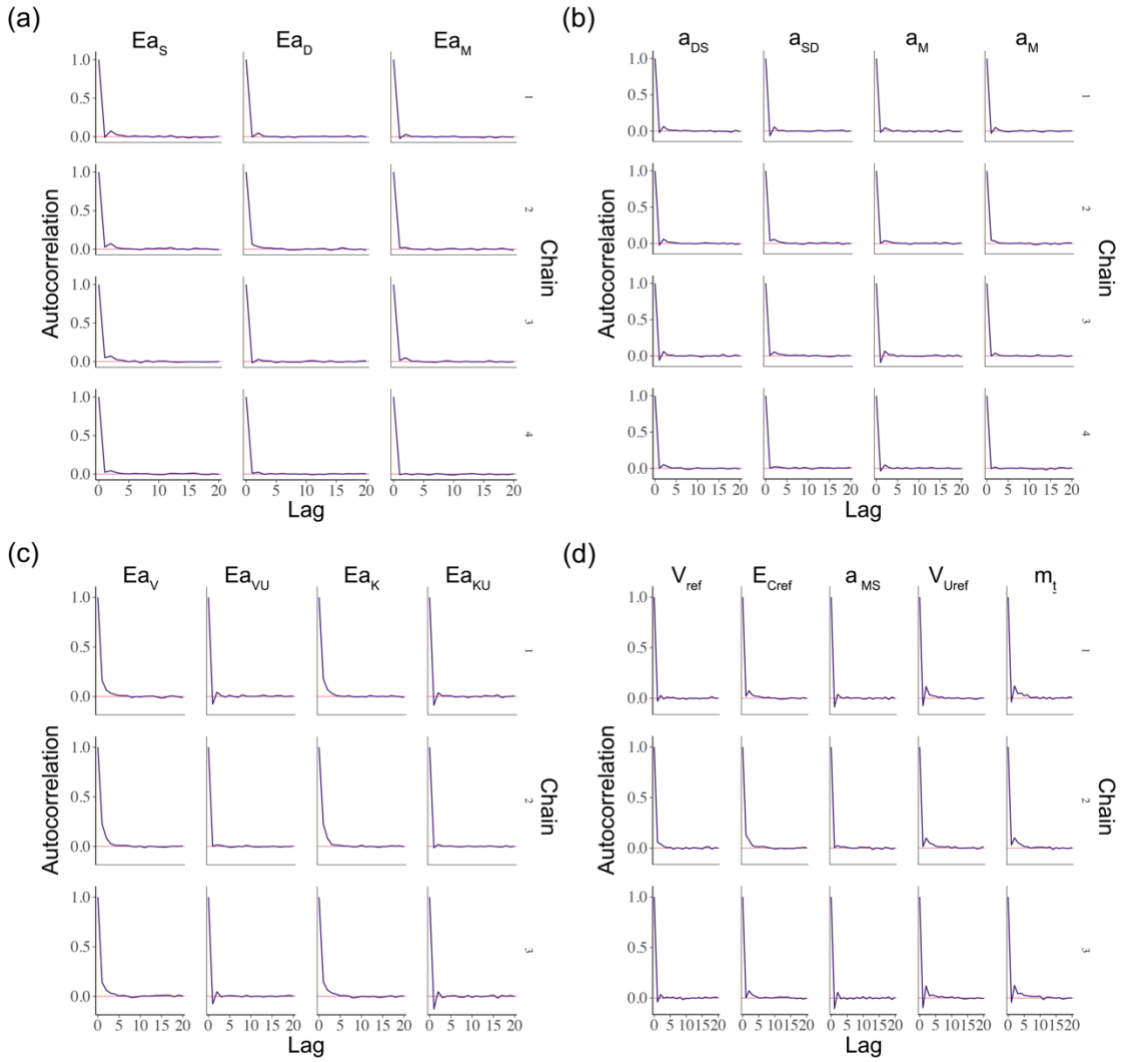

454  
 456  
 458  
 460  
 462  
 464  
 466

468  
470

**Supplemental Figure 7:**  $\hat{R}$  is a Bayesian diagnostic measure that estimates the degree of convergence between multiple Markov chains. An  $\hat{R}$  value that approaches 1 as the number of Markov chain iterations increase is ideal. Plots of  $\hat{R}$  values for **(a)** CON; and **(b)** AWB parameters corresponding to simulations using pre-warming SOC = 100 mg C g<sup>-1</sup> soil, MIC = 2 mg C g<sup>-1</sup> soil, DOC = 0.2 mg C g<sup>-1</sup> soil, and (for AWB) ENZ = 0.1 mg C g<sup>-1</sup> soil.

(a)

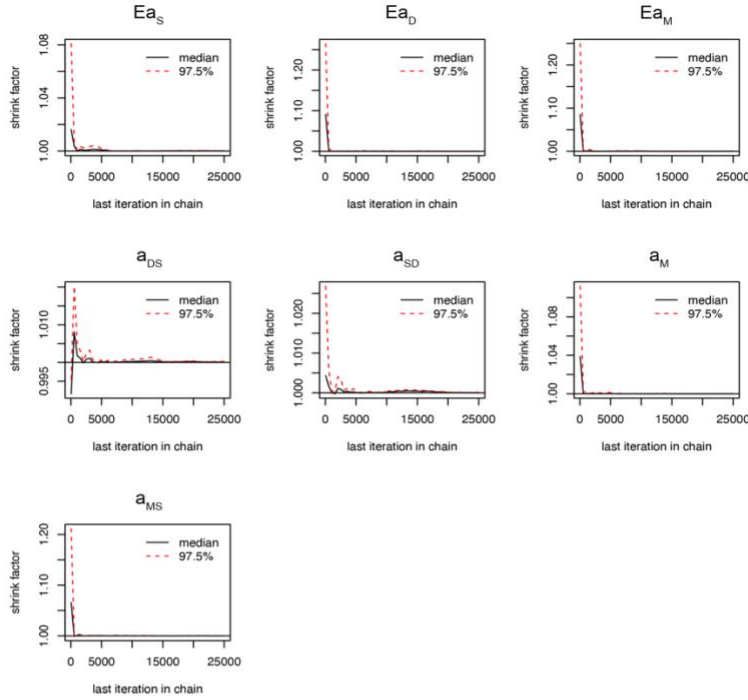

(b)

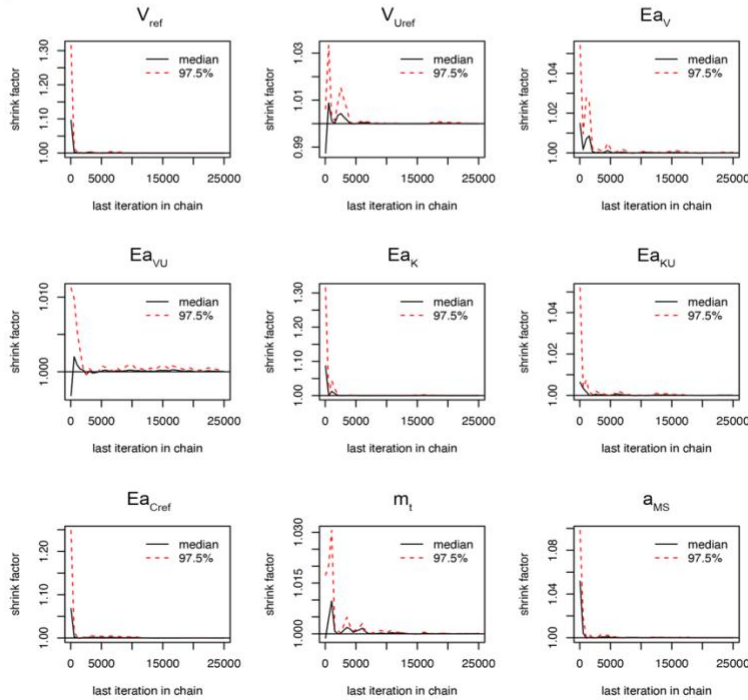

472

474 **Supplemental Figure 8:** Plots of effective parameter counts for CON and AWB in SOC-varied and MIC-varied  
 476 HMC runs. Decreasing SOC in AWB and CON runs increased effective parameter count and over-fitting  
 punishment in the LOO and WAIC calculations. Effective parameter counts computed as part of (a) LOO for SOC-  
 varied runs; (b) WAIC for SOC-varied runs; (c) LOO for MIC-varied runs; and (d) WAIC for MIC-varied runs.

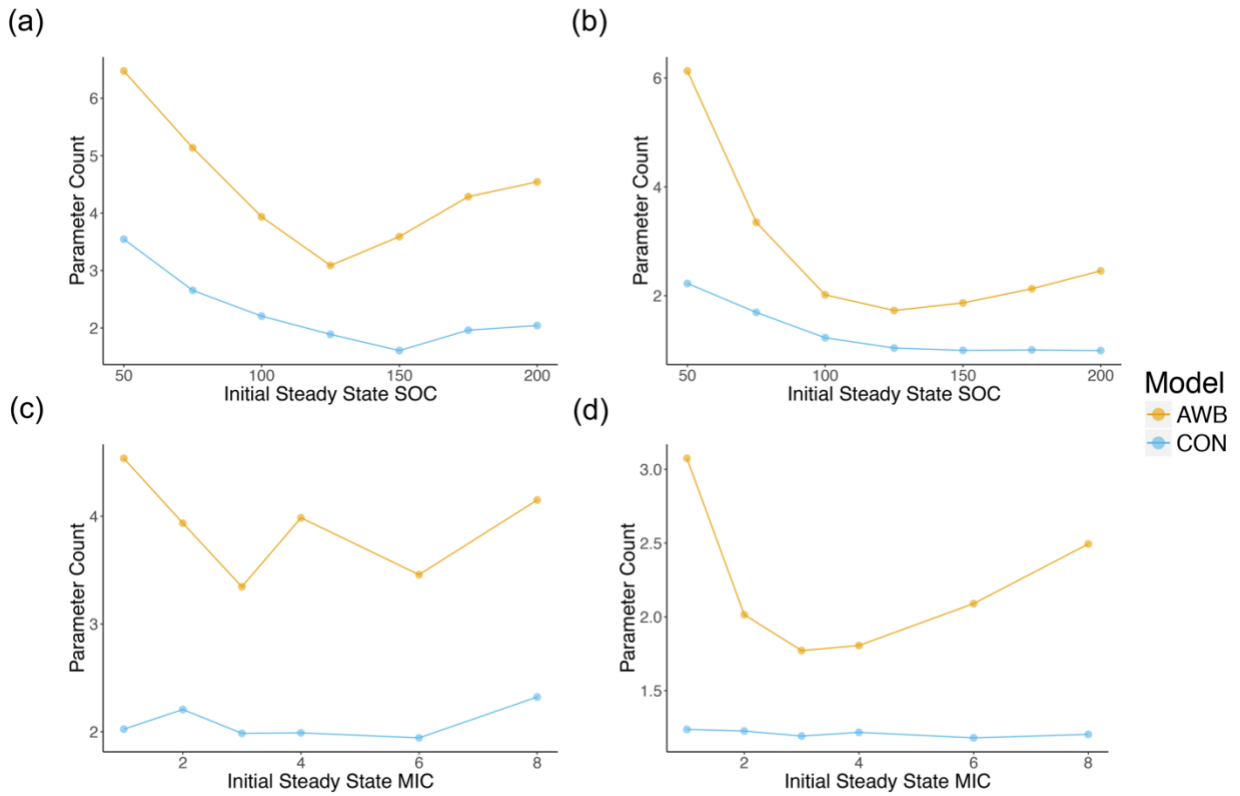

478  
 480  
 482  
 484  
 486  
 488  
 490  
 492  
 494  
 496  
 498  
 500



502 **Supplemental Figure 9:** Ratio of divergent transitions to total posterior samples collected in AWB runs. Decreasing  
504 the MIC-to-SOC ratio in AWB runs corresponded to an increase in the number of divergent transitions. Divergent  
transition frequencies in (a) varied SOC runs; and (b) in varied MIC runs.

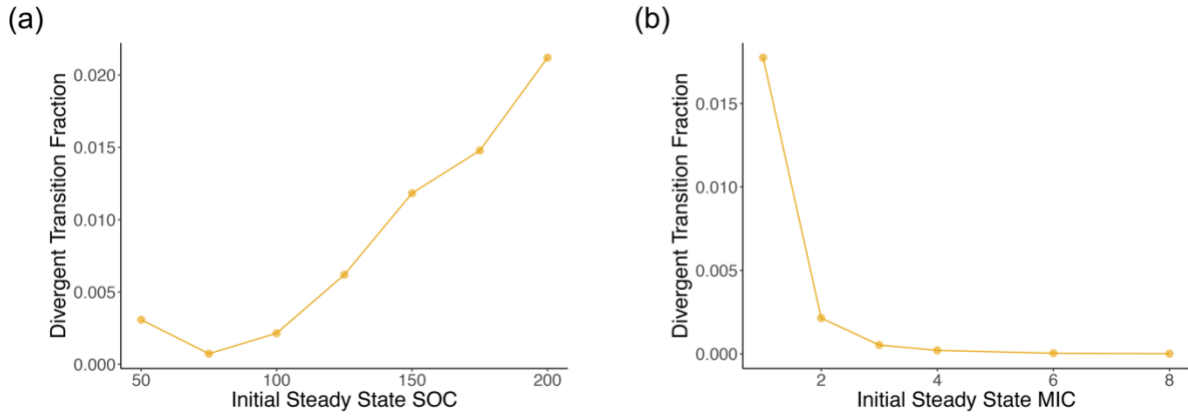

506  
508  
510  
512  
514  
516  
518  
520  
522  
524  
526  
528  
530  
532  
534  
536  
538  
540  
542

544  
546

**Supplemental Figure 10:** Fraction change of SOC stocks from 143 field warming studies versus study duration (van Gestel et al., 2018). A statistical analysis not accounting for sample size of each study found that the effect of duration on fraction change was insignificant ( $p = 0.7822$ ). Fraction change ranged from 0.544 to 1.9. Mean fraction change was 1.03, not accounting for sample sizes.

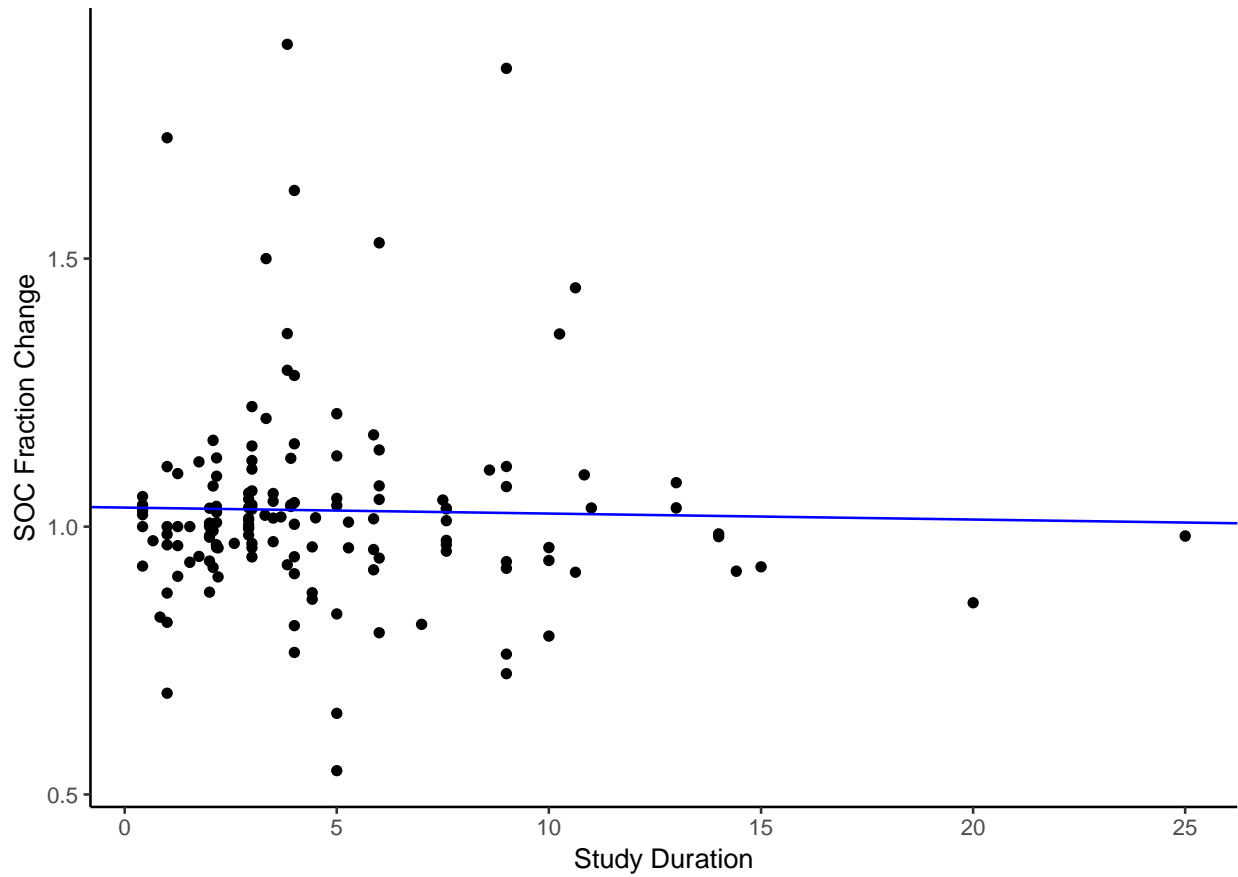

548  
550  
552  
554  
556  
558  
560  
562  
564  
566  
568  
570

572 **Supplemental Table 4:**  $N_{\text{eff}} / N$  (effective posterior sample ratio) for model parameters. Ratios of effective posterior samples to total posterior samples for each parameter fit to in the AWB and CON runs.

574 (a) CON SOC-varied runs

| Parameter | SOC = 50 | SOC = 75 | SOC = 100 | SOC = 125 | SOC = 150 | SOC = 175 | SOC = 200 |
|-----------|----------|----------|-----------|-----------|-----------|-----------|-----------|
| $Ea_S$    | 0.7708   | 0.7856   | 0.7921    | 0.8446    | 0.7685    | 0.8423    | 0.8359    |
| $Ea_D$    | 1.0000   | 1.0000   | 0.8920    | 1.0000    | 0.9356    | 1.0000    | 1.0000    |
| $Ea_M$    | 1.0000   | 1.0000   | 0.9421    | 1.0000    | 0.9136    | 1.0000    | 1.0000    |
| $a_{DS}$  | 1.0000   | 1.0000   | 1.0000    | 1.0000    | 1.0000    | 1.0000    | 1.0000    |
| $a_{SD}$  | 1.0000   | 1.0000   | 1.0000    | 1.0000    | 0.8226    | 1.0000    | 1.0000    |
| $a_M$     | 1.0000   | 1.0000   | 1.0000    | 1.0000    | 1.0000    | 1.0000    | 1.0000    |
| $a_{MS}$  | 1.0000   | 1.0000   | 0.9226    | 1.0000    | 0.9177    | 1.0000    | 1.0000    |
| $\sigma$  | 0.6182   | 0.6641   | 0.6166    | 0.6432    | 0.6149    | 0.6821    | 0.6344    |

576 (b) AWB SOC-varied runs

| Parameter     | SOC = 50 | SOC = 75 | SOC = 100 | SOC = 125 | SOC = 150 | SOC = 175 | SOC = 200 |
|---------------|----------|----------|-----------|-----------|-----------|-----------|-----------|
| $V_{ref}$     | 0.3642   | 1.0000   | 1.0000    | 0.7557    | 0.7705    | 0.8939    | 0.8038    |
| $V_{U_{ref}}$ | 0.5190   | 1.0000   | 1.0000    | 0.5679    | 0.4973    | 1.0000    | 0.5206    |
| $Ea_V$        | 0.0689   | 0.7158   | 0.6108    | 0.4743    | 0.4496    | 0.4597    | 0.4079    |
| $Ea_{VU}$     | 0.7576   | 1.0000   | 1.0000    | 0.8374    | 0.8901    | 1.0000    | 0.8460    |
| $Ea_K$        | 0.1994   | 0.7085   | 0.6148    | 0.4702    | 0.4545    | 0.4701    | 0.4287    |
| $Ea_{KU}$     | 0.8343   | 1.0000   | 1.0000    | 0.8575    | 0.8936    | 1.0000    | 0.8390    |
| $E_{C_{ref}}$ | 0.3305   | 0.6603   | 0.7058    | 0.5220    | 0.3752    | 0.3572    | 0.2342    |
| $m_t$         | 0.6162   | 1.0000   | 1.0000    | 0.5341    | 0.5880    | 1.0000    | 0.5904    |
| $a_{MS}$      | 0.8619   | 1.0000   | 1.0000    | 0.8114    | 0.9012    | 1.0000    | 0.8356    |
| $\sigma$      | 0.4510   | 0.6577   | 0.6396    | 0.5424    | 0.5430    | 0.5882    | 0.5105    |

578 (c) CON MIC-varied runs

| Parameter | MIC = 1 | MIC = 2 | MIC = 3 | MIC = 4 | MIC = 6 | MIC = 8 |
|-----------|---------|---------|---------|---------|---------|---------|
| $Ea_S$    | 1.0000  | 0.7921  | 1.0000  | 1.0000  | 0.8201  | 0.7856  |
| $Ea_D$    | 1.0000  | 0.8920  | 1.0000  | 1.0000  | 0.8935  | 1.0000  |
| $Ea_M$    | 1.0000  | 0.9421  | 1.0000  | 1.0000  | 0.9057  | 0.9182  |
| $a_{DS}$  | 1.0000  | 1.0000  | 1.0000  | 1.0000  | 1.0000  | 1.0000  |
| $a_{SD}$  | 1.0000  | 1.0000  | 1.0000  | 1.0000  | 1.0000  | 1.0000  |
| $a_M$     | 1.0000  | 1.0000  | 1.0000  | 1.0000  | 1.0000  | 1.0000  |
| $a_{MS}$  | 1.0000  | 0.9226  | 1.0000  | 1.0000  | 0.9255  | 1.0000  |
| $\sigma$  | 0.6548  | 0.6166  | 0.6901  | 0.6759  | 0.6148  | 0.6258  |

580 (d) AWB MIC-varied runs

| Parameter     | MIC = 1 | MIC = 2 | MIC = 3 | MIC = 4 | MIC = 6 | MIC = 8 |
|---------------|---------|---------|---------|---------|---------|---------|
| $V_{ref}$     | 0.6324  | 1.0000  | 1.0000  | 0.8350  | 0.9067  | 0.8005  |
| $V_{U_{ref}}$ | 0.7500  | 1.0000  | 1.0000  | 1.0000  | 1.0000  | 0.6008  |
| $Ea_V$        | 0.4216  | 0.6108  | 0.5942  | 0.5510  | 0.6135  | 0.5555  |

|           |        |        |        |        |        |        |
|-----------|--------|--------|--------|--------|--------|--------|
| $Ea_{VU}$ | 0.7500 | 1.0000 | 1.0000 | 1.0000 | 1.0000 | 0.8975 |
| $Ea_K$    | 0.4283 | 0.6148 | 0.5959 | 0.5651 | 0.6101 | 0.5557 |
| $Ea_{KU}$ | 0.7500 | 1.0000 | 1.0000 | 1.0000 | 1.0000 | 0.8842 |
| $E_{ef}$  | 0.4559 | 0.7058 | 0.6996 | 0.5715 | 0.5393 | 0.4942 |
| $m_t$     | 0.4294 | 1.0000 | 1.0000 | 0.6233 | 0.6211 | 0.6247 |
| $a_{MS}$  | 0.7500 | 1.0000 | 1.0000 | 1.0000 | 1.0000 | 0.7735 |
| $\sigma$  | 0.4438 | 0.6396 | 0.6555 | 0.5900 | 0.5916 | 0.5097 |

582
